# Supplementary material for: Pulmonary Fibroelastotic Remodelling Revisited
Source: MDPI journal article supplement (doi:10.3390/cells10061362), 2021-06-01
Supplement: s1 [file s1]

## Supplementary material for Braubach et al.: “Pulmonary fibroelastotic remodeling revisited”

### Supplementary table S1: Detailed patient information:

Detailed clinical information for the investigated patient collective including the group age at time of surgery and sex.

|    | Group | Age | Sex | Clinical information                                                                                                                                   |
|----|-------|-----|-----|--------------------------------------------------------------------------------------------------------------------------------------------------------|
| 1  | PAC   | 75  | m   | Partial upper lobe resection due to emphysematous bullae. Incidental PAC.                                                                              |
| 2  | PAC   | 57  | m   | Upper lobe resection due to adenocarcinoma. Incidental PAC.                                                                                            |
| 3  | PAC   | 71  | f   | Partial upper lobe resection due to adenocarcinoma. Incidental PAC.                                                                                    |
| 4  | PAC   | 67  | f   | Upper lobe resection due to squamous cell carcinoma. Incidental PAC.                                                                                   |
| 5  | PAC   | 40  | f   | Partial upper lobe resection due to metastasis of renal cell carcinoma. Incidental PAC.                                                                |
| 6  | PAC   | 69  | f   | Partial upper lobe resection due to recurrent adenocarcinoma. Incidental PAC.                                                                          |
| 7  | PAC   | 62  | f   | Double lung transplantation due to pulmonary hypertension. Incidental PAC.                                                                             |
| 8  | PAC   | 74  | f   | Resection of upper lobe due to adenocarcinoma. Incidental PAC.                                                                                         |
| 9  | PAC   | 31  | f   | Partial upper lobe resection due to recurrent spontaneous pneumothorax. Incidental PAC.                                                                |
| 10 | PAC   | 25  | m   | Partial upper lobe resection due to recurrent spontaneous pneumothorax. Incidental PAC.                                                                |
| 11 | PAC   | 63  | m   | Partial upper lobe resection due to unclear apical mass and suspected cancer metastasis. Histologic analysis revealed PAC as correlate of apical mass. |
| 12 | PAC   | 23  | m   | Partial upper lobe resection due to recurrent spontaneous pneumothorax. Incidental PAC.                                                                |
| 13 | PAC   | 68  | f   | Partial upper lobe resection due to adenocarcinoma. Incidental PAC.                                                                                    |
| 14 | PAC   | 77  | f   | Partial upper lobe resection due to apical mass and suspected lung cancer. Histologic analysis revealed PAC as correlate of apical mass.               |
| 15 | CLAD  | 54  | m   | Re-DLTX after 3 years due to CLAD/RAS. Primary diagnosis was pulmonary fibrosis with NSIP pattern.                                                     |
| 16 | CLAD  | 59  | m   | Re-DLTX after 4 years due to CLAD/RAS. Primary diagnosis was pulmonary emphysema without AAT-deficiency.                                               |
| 17 | CLAD  | 48  | f   | Re-DLTX after 4 years due to CLAD/RAS. Primary diagnosis was pulmonary fibrosis with UIP pattern.                                                      |
| 18 | CLAD  | 23  | f   | Re-DLTX after 2 years due to CLAD/BOS. Primary diagnosis was CF with bronchiectasis.                                                                   |
| 19 | CLAD  | 35  | f   | Re-DLTX after 7 years due to CLAD/RAS. Primary diagnosis was CF with bronchiectasis.                                                                   |
| 20 | CLAD  | 45  | f   | Re-DLTX after 5 years due to CLAD/BOS. Primary diagnosis was CF with bronchiectasis.                                                                   |
| 21 | CLAD  | 38  | f   | Re-DLTX after 10 years due to CLAD/BOS. Primary diagnosis was pulmonary emphysema.                                                                     |
| 22 | CLAD  | 55  | f   | Re-DLTX after 14 years due to CLAD/BOS. Primary diagnosis was pulmonary emphysema.                                                                     |
| 23 | CLAD  | 38  | f   | Re-DLTX after 5 years due to CLAD/BOS. Primary diagnosis was CF with bronchiectasis.                                                                   |
| 24 | CLAD  | 50  | m   | Re-DLTX after 5 years due to CLAD/RAS. Primary diagnosis was pulmonary emphysema.                                                                      |
| 25 | CLAD  | 44  | m   | Re-DLTX after 2 years due to CLAD/RAS. Primary diagnosis was pulmonary fibrosis with UIP pattern and on the basis of an exogenous allergic alveolitis. |

|    |       |    |   |                                                                                                                                                                                                           |
|----|-------|----|---|-----------------------------------------------------------------------------------------------------------------------------------------------------------------------------------------------------------|
| 26 | CLAD  | 51 | f | Re-DLTX after 8 years due to CLAD/BOS. Primary diagnosis was pulmonary veno-occlusive disease.                                                                                                            |
| 27 | GvHD  | 24 | m | Partial upper lobe resection due to pneumonia and bronchiectasis. HSCT due to ALL.                                                                                                                        |
| 28 | GvHD  | 15 | f | DLTX due to HSCT associated fibrosis/BO 10 years after HSCT due to leukemia.                                                                                                                              |
| 29 | GvHD  | 57 | f | DLTX due to HSCT associated fibrosis/BO 19 years after HSCT due to bilinear NHL.                                                                                                                          |
| 30 | GvHD  | 15 | m | DLTX due to BO and recurrent pneumothorax 6 years after HSCT due to bcr/abl positive leukemia.                                                                                                            |
| 31 | GvHD  | 20 | m | DLTX due to HSCT associated fibrosis/BO 2 years after HSCT due HL.                                                                                                                                        |
| 32 | GvHD  | 32 | m | DLTX due to BO and recurrent pneumothorax 3 years after HSCT due to bcr/abl positive leukemia.                                                                                                            |
| 33 | GvHD  | 9  | m | DLTX due to BO and recurrent pneumothorax 3 years after HSCT due to combined immunodeficiency.                                                                                                            |
| 34 | ILD   | 49 | f | DLTX due to pulmonary fibrosis (primary diagnosis was 3 years before) with focal UIP pattern and concomitant AFE pattern. Clinically suspected exogenic allergic alveolitis.                              |
| 35 | ILD   | 47 | f | DLTX due to pulmonary fibrosis in stage IV sarcoidosis (primary diagnosis was made 19 previously) interstitial fibrosis and concomitant AFE pattern.                                                      |
| 36 | iPPFE | 54 | f | DLTX due to interstitial fibrosis with clinical and radiological PPFE pattern and no determinable cause. Primary diagnosis was made 2 years before.                                                       |
| 37 | RCTX  | 52 | f | DLTX due to interstitial fibrosis after radio-chemotherapy of HL. Primary diagnosis of pulmonary fibrosis was made 1 year before.                                                                         |
| 38 | iPPFE | 58 | f | DLTX due to interstitial fibrosis with clinical and radiological PPFE pattern and no determinable cause. Primary diagnosis was made 2 years before.                                                       |
| 39 | iPPFE | 61 | m | DLTX due to interstitial lung disease with radiological UIP pattern and no known cause. Histologic examination revealed wide-spread AFE pattern lung fibrosis. Primary diagnosis was made 2 years before. |
| 40 | AID   | 45 | f | DLTX due to pulmonary fibrosis on the basis of rheumatoid arthritis. Primary diagnosis was made 11 years before.                                                                                          |
| 41 | iPPFE | 56 | f | DLTX due to interstitial fibrosis with clinical PPFE pattern and no determinable cause. Primary diagnosis was made 2 years before                                                                         |
| 42 | AID   | 44 | m | DLTX due to pulmonary fibrosis and hypertension on the basis of a mixed connective tissue disease. Primary diagnosis was made 35 years before.                                                            |
| 43 | RCTX  | 58 | f | Partial lung resection due to suspected recurrent adenocarcinoma treated with radiotherapy 1 year before. Widespread AFE pattern fibrosis upon histological examination.                                  |
| 44 | iPPFE | 59 | m | DLTX due to interstitial fibrosis with clinical and radiological PPFE pattern and no determinable cause.                                                                                                  |
| 45 | iPPFE | 24 | m | DLTX due to suspected histiocytosis. Histological examination showed wide-spread AFE pattern pulmonary fibrosis.                                                                                          |

#### Abbreviations

|      |                                    |
|------|------------------------------------|
| AAT  | Alpha-1-Antitrypsin                |
| ALL  | Acute lymphocytic leukemia         |
| CF   | Cystic fibrosis                    |
| CLAD | Chronic lung allograft dysfunction |
| DLTX | Double lung transplantation        |
| f    | Female                             |
| HL   | Hodgkin lymphoma                   |
| LTX  | Lung transplantation               |
| m    | Male                               |
| NHL  | Non-Hodgkin lymphoma               |
| NSIP | Nonspecific interstitial pneumonia |
| PAC  | Pulmonary apical cap               |
| RAS  | Restrictive allograft syndrome     |
| UIP  | Usual interstitial pneumonia       |

Supplementary figure S1

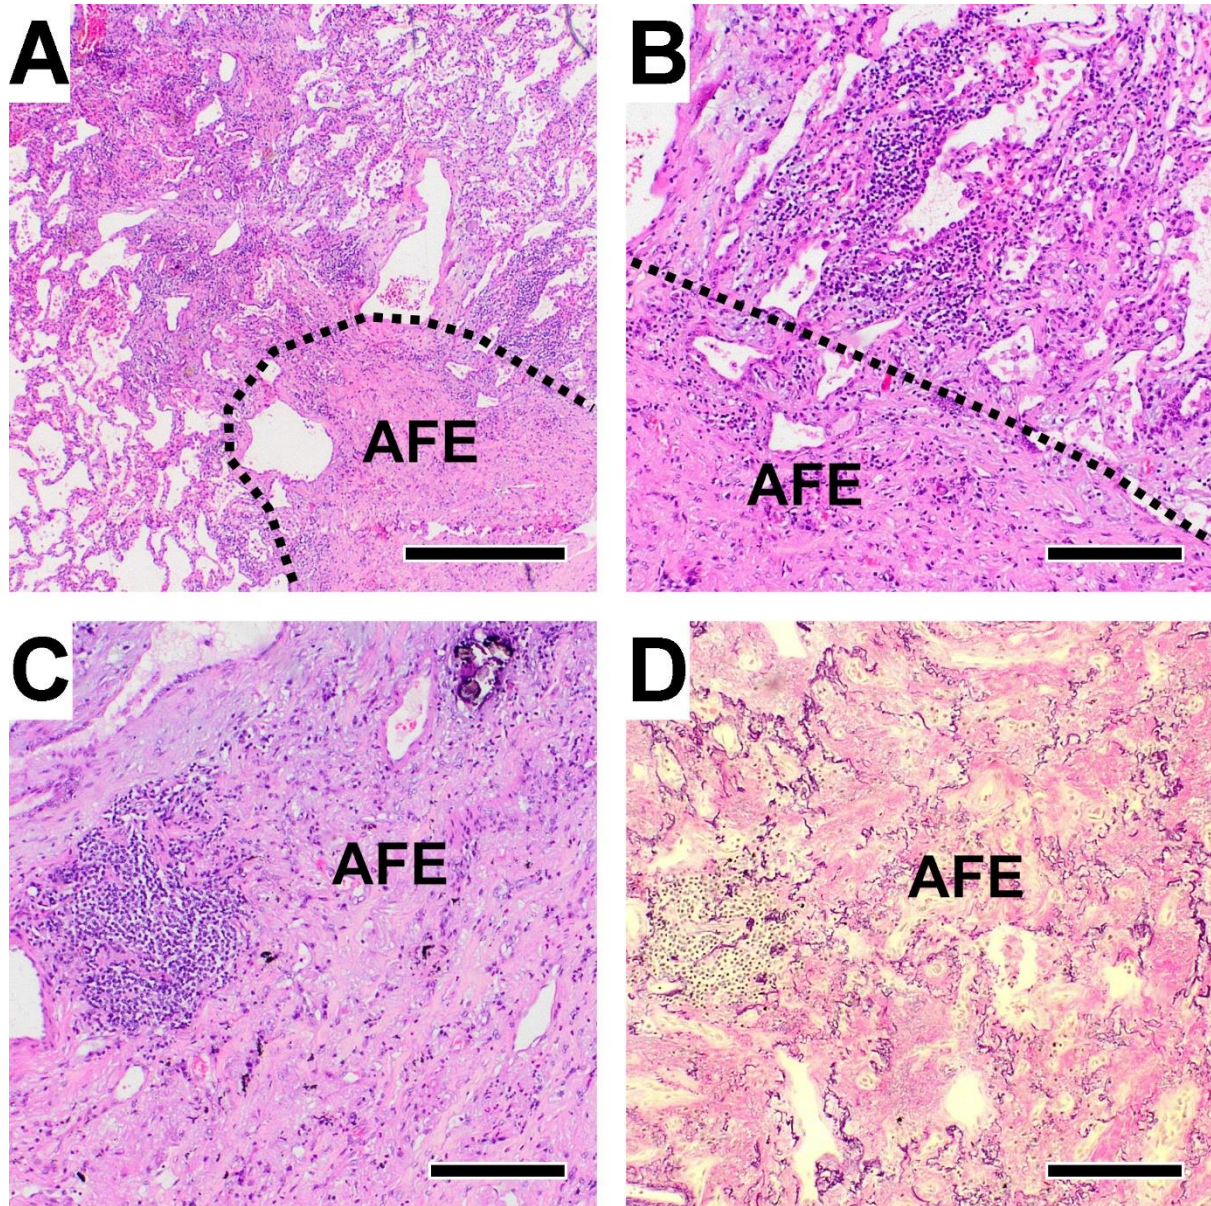

Supplementary figure S1: Alveolar fibroelastosis (AFE) in concomitant interstitial lung disease (ILD): AFE can present as secondary pattern in pulmonary fibrosis with other patterns (e.g. usual interstitial pneumonia). In this case (Case no 34) regions with AFE-pattern fibrosis show little to no (diffuse) lymphocytic infiltrate. In contrast remodeled parenchyma without AFE shows marked lymphocytic infiltration (A, B). In regions with AFE occasional lymphocytic aggregates, mostly in the periphery of the lesion, can be observed (C, D). A-C are stained with hematoxylin and eosin, D with elastic van Giesson. Scalebars are A: 600  $\mu$ m, B-D: 200  $\mu$ m.
